## COL3A1 and SNAP91: novel glioblastoma markers with diagnostic and prognostic value

Yuan-Feng Gao<sup>1,2</sup>, Xiao-Yuan Mao<sup>1,2</sup>, Tao Zhu<sup>1,2</sup>, Chen-Xue Mao<sup>1,2</sup>, Zhi-Xiong Liu<sup>3</sup>, Zhi-Bin Wang<sup>1,2</sup>, Ling Li<sup>1,2</sup>, Xi Li<sup>1,2</sup>, Ji-Ye Yin<sup>1,2</sup>, Wei Zhang<sup>1,2</sup>, Hong-Hao Zhou<sup>1,2</sup>, Zhao-Qian Liu<sup>1,2</sup>

<sup>1</sup>Department of Clinical Pharmacology, Xiangya Hospital, Central South University, Changsha 410008, P. R. China

<sup>2</sup>Institute of Clinical Pharmacology, Central South University, Hunan Key Laboratory of Pharmacogenetics, Changsha 410078, P. R. China

<sup>3</sup>Department of Neurosurgery, Xiangya Hospital, Central South University, Changsha 410008, P. R. China

Correspondence to: Zhao-Qian Liu, email: liuzhaoqian63@126.com

Xiao-Yuan Mao, email: maoxiaoyuan2011@163.com

Keywords: glioblastoma, novel glioblastoma markers, prognostic value, COL3A1, SNAP91

Received: June 16, 2016

Accepted: August 26, 2016

Published: September 15, 2016

### ABSTRACT

Although patients with glioblastoma (GBM) have grave prognosis, significant variability in patient outcome is observed. This study aims to identify novel targets for GBM diagnosis and therapy. Microarray data (GSE4290, GSE7696, and GSE4412) obtained from the Gene Expression Omnibus was used to identify the differentially expressed genes (DEGs) by significant analysis of microarray (SAM). Intersection of the identified DEGs for each profile revealed 46 DEGs in GBM. A subset of common DEGs were validated by real-time reverse transcription quantitative PCR (qPCR). The prognostic value of some of the markers was also studied. We determined that *RRM2* and *COL3A1* were increased and directly correlated with glioma grade, while *SH3GL2* and *SNAP91* were decreased in GBM and inversely correlated with glioma grade. Kaplan-Meier analysis of GSE7696 revealed that *COL3A1* and *SNAP91* correlated with survival, suggesting that *COL3A1* and *SNAP91* may be suitable biomarkers for diagnostic or therapeutic strategies for GBM.

### INTRODUCTION

Glioma is the most common malignant primary brain tumor in humans, occurring in 6 of every 100,000 people. With a five-year survival rate of 20-30%, it is also one of the most aggressive [1]. These tumors are composed of a heterogeneous population of cells that contributes to the resiliency of the disease [2]. Generally speaking, gliomas are classified as either relatively slow growing low-grade (I or II) tumors or rapidly growing, highly metastatic high-grade (III or IV) tumors [3]. Overall, the disease is a fast-progressing fatal malignancy and the majority of patients with high-grade gliomas (III or IV) suffer from a poor quality of life [4, 5]. Currently, the standard clinical treatment is surgical resection followed by radiotherapy and chemotherapy [6–9]. However, patients who receive these treatments may develop resistance to chemotherapy [10]. Thus, recent efforts have focused on identification of candidate biomarkers of glioblastoma (GBM; grade IV glioma) development for early detection and to produce more effective therapeutic strategies [11–13].

At present, diagnosis of GBMs is mainly based on histological detection. Although the importance of numerous genes, including EGFR, bFGF, VEGF, IGF-1, p53 and p16 [14–19] to glioma progression has been well established. These genes are neither predictive of survival of glioma patients nor able to guide therapeutic decisions. With the continuous development of biotechnology and the innovation of novel high-throughput technology, studies have begun to investigate diseases at the genome level, and gene chip technology has become more common. To date, microarray analysis has been successfully used to identify unknown glioma-associated oncogenes [20], and analyze gene expression within different biological networks [21–23].

In the present study, we analyzed three microarray gene expression profiles to examine changes in gene expression associated with glioma progression and identify novel targets for glioblastoma diagnosis and therapy. We identified 46 differentially expressed genes in GBM that were common among all three profiles. Differential expression of a subset of differentially expressed genes

(DEGs) was validated by real-time quantitative reverse transcription PCR (qPCR). We determined that *RRM2* and *COL3A1* were up-regulated and directly correlated with glioma grade, while *SH3GL2* and *SNAP91* were down-regulated in GBM and inversely correlated with glioma grade. Kaplan-Meier analysis of GSE7696 revealed that *COL3A1* and *SNAP91* correlated with survival, suggesting that *COL3A1* and *SNAP91* may be suitable biomarkers for diagnostic or therapeutic strategies for GBM.

## RESULTS

### Identification of DEGs

Three gene expression profiles (GSE4290, GSE7696 and GSE4412) of non-tumor, low grade

glioma and high grade glioma tissue samples were analyzed to identify genes differentially expressed during tissue progression. A total of 1,183 genes (343 up-regulated and 840 down-regulated genes) between normal and tumor tissues in GSE4290, 1,787 genes (821 up-regulated and 966 down-regulated genes) between normal and GBM tissues in GSE7696, and 138 genes (110 up-regulated and 28 down-regulated genes) between grade IV and III grade glioma samples in GSE4412 were filtered as differentially expressed genes (DEGs) (Figure 1A–1C, Supplementary Table S1). Intersection of the DEGs identified a total of 46 common DEGs, suggesting that these DEGs may play an important role during glioma progression (Figure 1D, Table 1). Moreover, the results of cluster analysis are showed in Supplementary Figure S1.

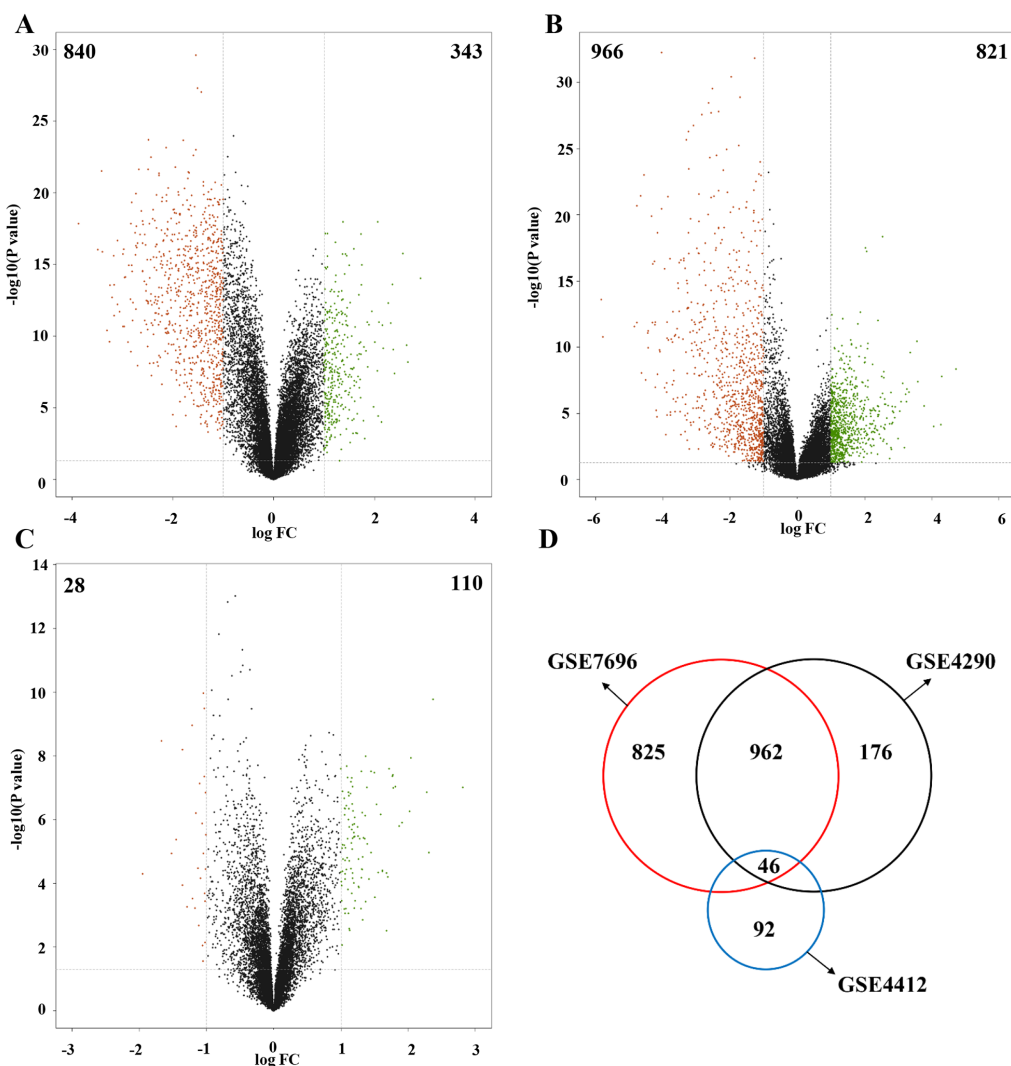

**Figure 1: Identification of DEGs.** A. There were 1,183 genes between normal and tumor tissues in GSE4290 were filtered as DEGs, including 343 up-regulated and 840 down-regulated genes. B. A total of 1,787 genes between normal and tumor tissues in GSE7696 were filtered as DEGs, including 821 up-regulated and 966 down-regulated genes. C. 138 genes between grade IV and III grade samples in GSE4412 were filtered as DEGs, including 110 up-regulated and 28 down-regulated genes. D. After intersection, a total of 46 DEGs were detected.

**Table 1: Differently expressed genes (DEGs) in glioblastoma tissue samples**

| Differently Expressed Genes (DEGs) |                                                                                                                                                                                                                                                                       |
|------------------------------------|-----------------------------------------------------------------------------------------------------------------------------------------------------------------------------------------------------------------------------------------------------------------------|
| Upregulated                        | RRM2, COL3A1, COL1A1, COL4A1, TNC, COL4A2, PTX3, ANXA1, VEGFA, NNMT, CHI3L1, COL1A2, GBP1, LAMB1, IGFBP2, IGFBP3, TUBB6, PROS1, TGFBI, C1R, FSTL1, EMP3, ANXA2P2, SLC2A10, S100A10, FCGBP, SERPINA3, CLIC1, TRIP6, SERPINH1, C1QB, S100A11, CPVL, CFI, HLA-DRB1, C1QA |
| Downregulated                      | SH3GL2, SNAP91, MOBP, ETNPPL, GABBR2, ATP6V1G2, HLF, SLITRK5, GNAO1, NTSR2                                                                                                                                                                                            |

Note : RRM2, ribonucleotide reductase M2; COL3A1, collagen, type III, alpha 1; COL1A1, collagen, type I, alpha 1; COL4A1, collagen, type IV, alpha 1; TNC, tenascin C; COL4A2, collagen, type IV, alpha 2; PTX3, pentraxin 3; ANXA1, annexin A1; VEGFA, vascular endothelial growth factor A; NNMT, nicotinamide N-methyltransferase; CHI3L1, chitinase 3-like 1; COL1A2, collagen, type I, alpha 2; GBP1, guanylate binding protein 1; LAMB1, laminin, beta 1; IGFBP2, insulin-like growth factor binding protein 2; IGFBP3, insulin-like growth factor binding protein 3; TUBB6, tubulin, beta 6; PROS1, protein S1; TGFBI, transforming growth factor, beta-induced; C1R, complement component 1; FSTL1, follistatin-like 1; EMP3, epithelial membrane protein 3; ANXA2P2, annexin A2 pseudogene 2; SLC2A10, solute carrier family 2, member 10; S100A10, S100 calcium binding protein A10; FCGBP, Fc fragment of IgG binding protein; SERPINA3, serpin peptidase inhibitor, clade A, member 3; CLIC1, chloride intracellular channel 1; TRIP6, thyroid hormone receptor interactor 6; SERPINH1, serpin peptidase inhibitor, clade H, member 1; C1QB, complement component 1, q subcomponent, B chain; S100A11, S100 calcium binding protein A11; CPVL, carboxypeptidase, vitellogenic-like; CFI, complement factor I; HLA-DRB1, major histocompatibility complex, class II, DR beta 1; C1QA, complement component 1, q subcomponent, A chain; SH3GL2, SH3-domain GRB2-like 2; SNAP91, synaptosomal-associated protein; MOBP, myelin-associated oligodendrocyte basic protein; ETNPPL, ethanolamine-phosphate phospho-lyase; GABBR2, gamma-aminobutyric acid (GABA) B receptor 2; ATP6V1G2, ATPase, V1 subunit G2; HLF, hepatic leukemia factor; SLITRK5, SLIT and NTRK-like family 5; GNAO1, guanine nucleotide binding protein; NTSR2, neurotensin receptor 2.

### Function enrichment of DEGs

To identify the functional differences of DEGs in different glioma grades, gene ontology (GO) and Kyoto Encyclopedia of Genes and Genomes (KEGG) enrichment analyses were performed. Enrichment analysis suggested that DEGs function differed between different glioma grades. DEGs in GBM tissue compared to non-tumor tissue were mainly involved in the regulation of the extracellular matrix (ECM) (Table 2), an environment that is essential to tumor development and maintenance [24, 25].

### Independent validation of GBM DEGs

A subset of DEGs in GBM samples compared to non-tumor samples (Table 1) was further validated by real-time quantitative reverse transcription-PCR (qPCR). It's worth noting that there were four genes specifically expressed among DEGs. We found that expression of up-regulated DEGs *RRM2* and *COL3A1* (>2-fold up-regulated as determined by the gene expression profile) was significantly higher in malignant gliomas compared to lower grade gliomas and non-tumor brain tissue and directly correlated with glioma grade (Figure 2A & 2B). Expression of down-regulated DEGs *SH3GL2* and *SNAP91*, which were found to be >2-fold lower in GBM samples by

microarray analysis, was lower in malignant gliomas compared to non-tumor tissue and lower grade gliomas. Expression of *SH3GL2* and *SNAP91* also inversely correlated with glioma grade (Figure 2C & 2D). Additionally, the association between gene expression and clinicopathological parameters was analyzed in the present study. No significant association was observed between the expression of validated DEGs and patient age or gender (Table 3, Supplementary Table S2). Gene expression of the validate DEGs was consistent with the TCGA datasets (Figure 3). These results suggest that expression of DEGs correlates with glioma tumor grade.

### Survival value of GBM-specific markers

To investigate the relationship between the expression of the validated DEGs and patient survival, we analyzed the prognostic significance of the genes using Kaplan-Meier analysis for expression profile GSE7696. *COL3A1* and *SNAP91* expression correlated with survival ( $p = 0.018$ , Figure 4A;  $p = 0.014$ , Figure 4B). These results suggest that high expression of *COL3A1* and *SNAP91* in GBMs confer a survival advantage to patients. However, *RRM2*, and *SH3GL2* expression did not correlate with survival ( $p = 0.645$ , Figure 4C;  $p = 0.966$ , Figure 4D). Taken together, the data suggest that expression of *COL3A1* and *SNAP91* has prognostic value.

**Table 2: Enriched functions of DEGs in glioblastoma (Top 10)**

| Category         | Term                                                   | FDR      |
|------------------|--------------------------------------------------------|----------|
| GOTERM_CC_DIRECT | GO:0005576~extracellular region                        | 2.22E-07 |
| GOTERM_CC_DIRECT | GO:0005615~extracellular space                         | 1.78E-06 |
| GOTERM_MF_DIRECT | GO:0005201~extracellular matrix structural constituent | 7.86E-06 |
| GOTERM_CC_DIRECT | GO:0070062~extracellular exosome                       | 1.86E-05 |
| KEGG_PATHWAY     | hsa05150:Staphylococcus aureus infection               | 2.63E-05 |
| GOTERM_CC_DIRECT | GO:0031012~extracellular matrix                        | 3.34E-04 |
| KEGG_PATHWAY     | hsa04512:ECM-receptor interaction                      | 6.73E-04 |
| GOTERM_BP_DIRECT | GO:0030198~extracellular matrix organization           | 0.002918 |
| GOTERM_MF_DIRECT | GO:0048407~platelet-derived growth factor binding      | 0.003708 |
| KEGG_PATHWAY     | hsa04510:Focal adhesion                                | 0.008216 |

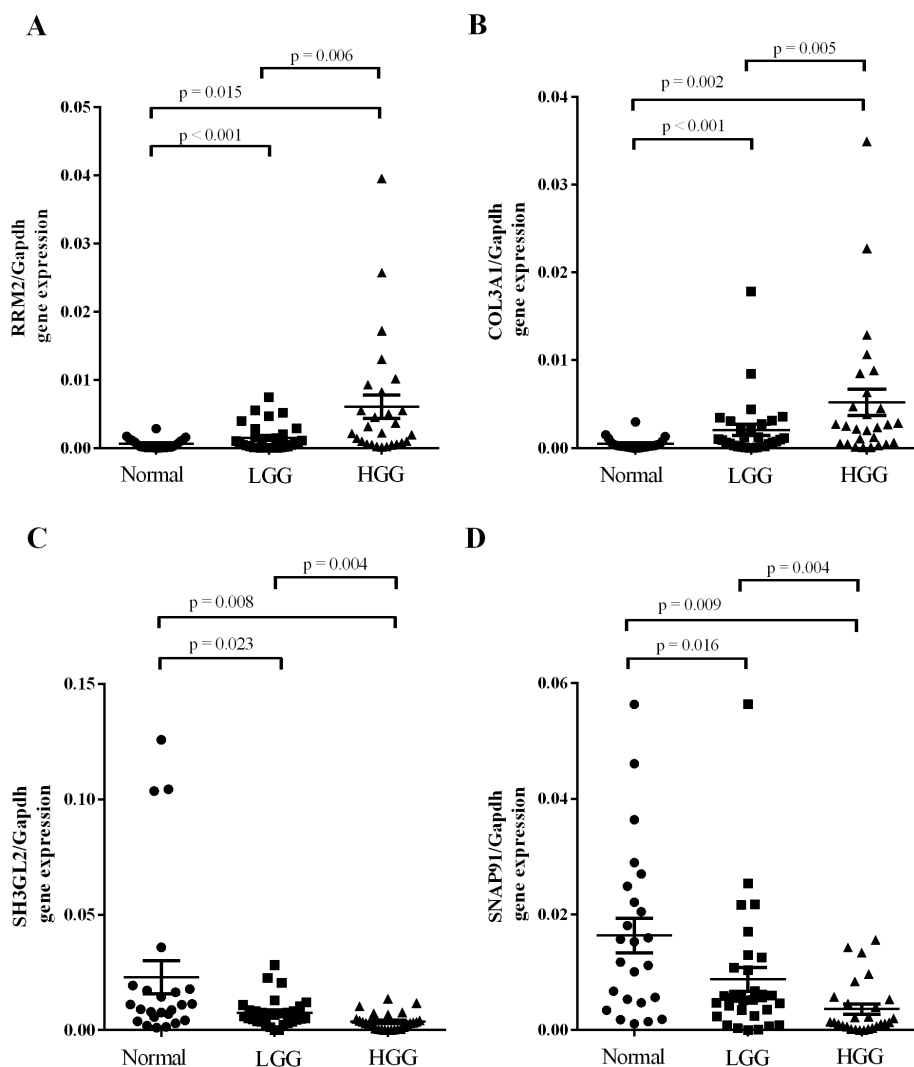

**Figure 2: Independent validation of GBM DEGs.** Some of the relevant genes were validated by real-time quantitative reverse transcription-PCR. **A.** RRM2 and **B.** COL3A1 expression was drastically increased in malignant gliomas and directly correlated with the glioma grade. **C.** SH3GL2 and **D.** SNAP91 expression was drastically decreased in malignant gliomas and also directly correlated with glioma grade.

**Table 3: Correlation between COL3A1/SNAP91 expression and glioma clinicopathologic features in 57 patients**

|                 | N%        | COL3A1 expression levels |                |                  | P     | SNAP91 expression levels |                |                  | P     |
|-----------------|-----------|--------------------------|----------------|------------------|-------|--------------------------|----------------|------------------|-------|
|                 |           | High expression          | Low expression | Ratio (High/Low) |       | High expression          | Low expression | Ratio (High/Low) |       |
| Sex             |           |                          |                |                  |       |                          |                |                  |       |
| male            | 42(73.68) | 11                       | 31             | 0.355            | 0.278 | 13                       | 29             | 0.448            | 0.930 |
| female          | 15(26.32) | 3                        | 12             | 0.250            |       | 2                        | 13             | 0.154            |       |
| Age, y          |           |                          |                |                  |       |                          |                |                  |       |
| <45             | 37(64.91) | 8                        | 29             | 0.276            | 0.419 | 9                        | 28             | 0.321            | 0.903 |
| ≥45             | 20(35.09) | 6                        | 14             | 0.428            |       | 6                        | 14             | 0.428            |       |
| Grade           |           |                          |                |                  |       |                          |                |                  |       |
| Low (I + II)    | 30(52.63) | 4                        | 26             | 0.154            | 0.050 | 10                       | 20             | 0.5              | 0.031 |
| High (III + IV) | 27(47.37) | 10                       | 17             | 0.588            |       | 5                        | 22             | 0.227            |       |

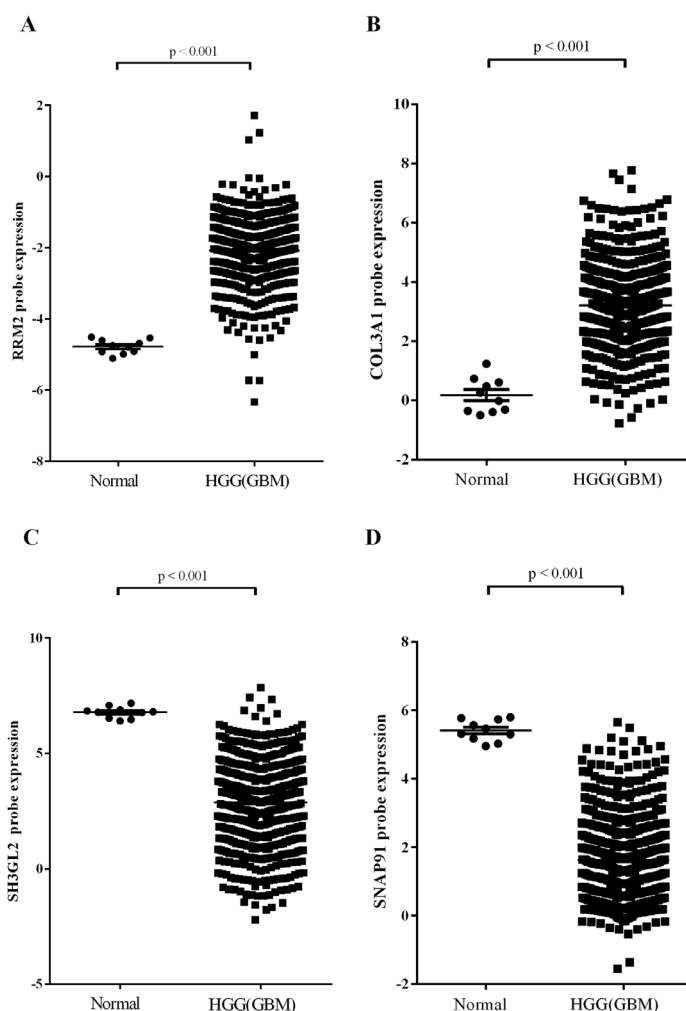

**Figure 3: Gene expression in TCGA dataset. A. RRM2. B. COL3A1. C. SH3GL2. D. SNAP91.**

## DISCUSSION

Recently, microarray-based expression profiling studies have revealed that genes differentially expressed among glioma grades could be of prognostic value [26]. Therefore, identification of genes differentially expressed in GBMs compared to lower grade gliomas could greatly facilitate prognostication and our ability to develop effective treatment protocols [27–29]. In order to identify potential biomarkers for glioblastoma prognosis and therapy, we used microarray data (GSE4290, GSE7696, and GSE4412) to identify the differentially expressed genes (DEGs) by significant analysis of microarray (SAM). 46 DEGs were found to be in common in all profiles. A subset of the DEGs identified in GBM—*COL3A1*, *SNAP91*, *RRM2*, and *SH3GL2*—were also validated by real-time reverse transcription quantitative PCR (qPCR).

A potential prognostic factor for GBM is *COL3A1*. We found that *COL3A1* was up-regulated in GBM tissues. *COL3A1* encodes a fibrillary collagen molecule that has been linked to myocardial infarction [30] and the risk of stroke recurrence and prognosis in Chinese patients [31]. *PDGFR $\beta$*  was found to significantly correlate with the reference *COL1A1*, *COL1A2*, and *COL3A1* expression [32]. Another potential target for GBM therapies and diagnosis is *SNAP91*. We determined that *SNAP91* was down-regulated in GBM tissues. *SNAP91* encodes a synapse-associated protein that is expressed highest in the brain [33].

We also determined that *RRM2* and *SH3GL2* are differentially expressed in GBM and could potentially serve as GBM biomarkers. *RRM2* codes an enzyme that's over-expression has been correlated with resistance to radiotherapy and chemotherapy, and enhanced malignant potential in multiple cancers [34–36]. *SH3GL2* is a multifunctional gene

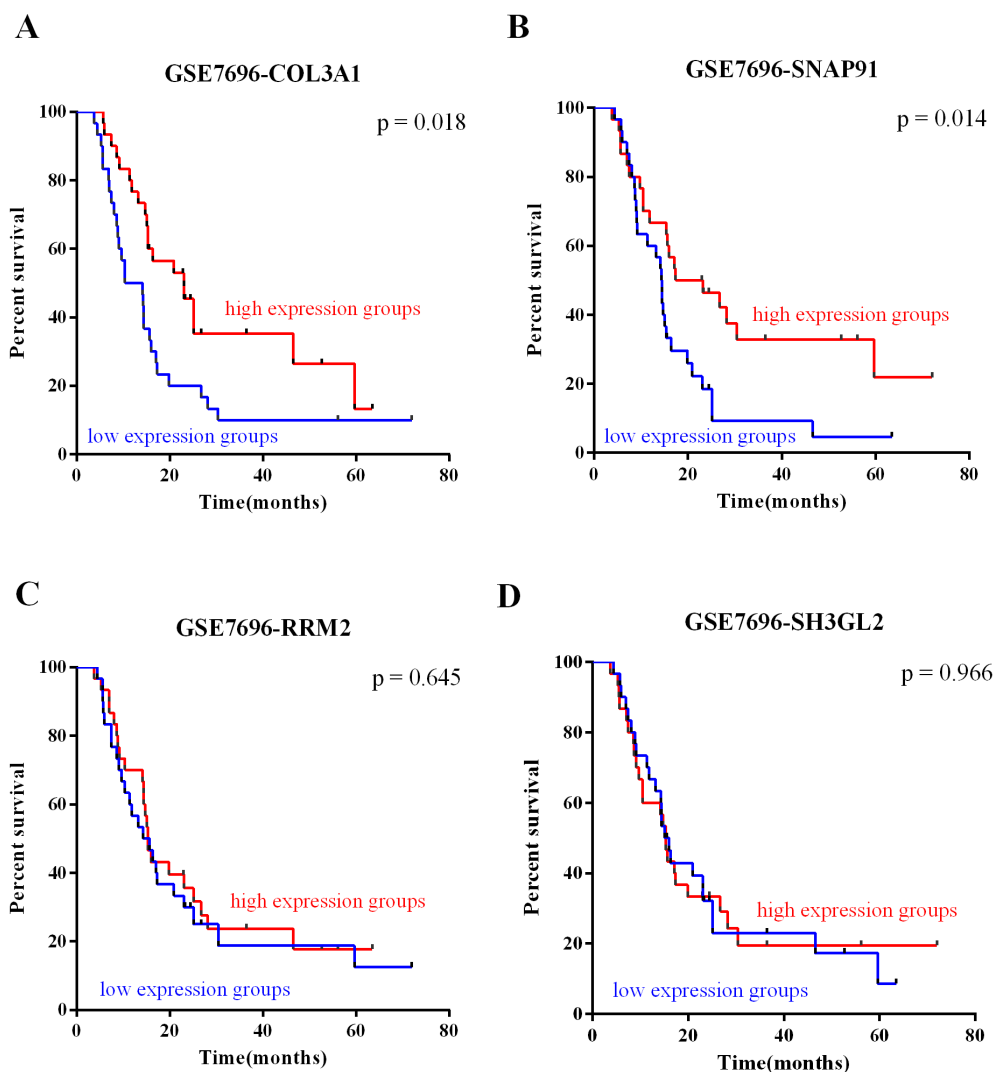

**Figure 4: Survival value of GBM-specific markers.** The survival value of GBM-specific markers was analyzed by subject GSE7696 dataset. In Kaplan-Meier analysis, A. *COL3A1* and B. *SNAP91* expression was correlated with survival. However, C. *RRM2* and D. *SH3GL2* expression did not correlate with survival.



that encodes a protein called endophilin-1. Endophilin-1 is primarily distributed in the central nervous system and functions as a tumor suppressor in many tumors. *SH3GL2* has been shown to be decreased by miR-330 and associated with *ERK* and *PI3K/AKT* signaling pathways [37, 38]. We also found that while *RRM2* and *SH3GL2* were differentially expressed in GBM, their expression had no prognostic value for GBM, suggesting that they are tumor-specific, but not GBM specific. Our results are in line with previous studies that showed that *RRM2* was tumor-specific, but not associated with the survival in GBM [39].

Microarray datasets not only renders the analysis of large quantities of biological information quick and simple, but also facilitates the identification of potential biomarkers for various diseases and medical conditions. In this study, we have identified and validated a set of novel GBM biomarker candidate genes. We also provided evidence of the prognostic value of two of these potential markers, *COL3A1* and *SNAP91*. However, further studies are needed to more precisely characterize the functional significance of these genes in glioma progression and their potential prognosis application for glioma needs to receive more attention.

## MATERIALS AND METHODS

### Affymetrix microarray analysis

Three expression profiles (GSE4290, GSE7696, and GSE4412) were acquired from the Gene Expression Omnibus (GEO, <http://www.ncbi.nlm.nih.gov/geo/>) database. The platform of GSE4290 and GSE7696 is GPL570 [HG-U133\_Plus\_2] Affymetrix Human Genome U133 Plus 2.0 Array. The platform of GSE4412 is GPL96 [HG-U133A] Affymetrix Human Genome U133A Array. In GSE4290 data, 23 brain tissue samples from epilepsy patients as non-tumor (control) samples and 157 glioma samples, including astrocytoma, oligodendroglioma and glioblastoma samples (45 grade II, 31 grade III and 81 grade IV) were used. Total of 80 glioblastoma specimen and 4 non-tumor brain samples were analysis in GSE7696. Only grade III (n = 24) and IV (n = 50) gliomas were included in GSE4412. The original CEL files and probe annotation of the platform was used.

### Data pre-processing

The probe-level data in CEL files were converted into expression profiles. Background correction and quartile data normalization were extracted by the robust multi-array average (RMA) with affy package. For genes corresponding to multiple probe sets, the gene expression values of those sets were averaged [40, 41].

### Differentially expressed genes (DEGs) analysis

Significant analysis of microarray (SAM) using two classes (tumor vs normal) of unpaired measurements was performed for DEGs identification in GSE4290

and GSE7696. GSE4412 only analyzed the DEGs between grade III and grade IV samples. Genes with a  $|\log \text{fold change (FC)}| \geq 2$  and  $p < 0.05$  were considered differentially expressed. The results from each analysis were intersected to identify common DEGs that may play a significant role in tumor progression.

### Gene ontology (GO) enrichment analysis

For preliminary investigation into the functional differences of DEGs in glioblastoma (GBM), Database for Annotation Visualization and Integrated Discovery (DAVID) online software (DAVID Bioinformatics Resources 6.7) was used to perform gene ontology (GO) and Kyoto Encyclopedia of Genes and Genomes (KEGG) enrichment analysis. DAVID utilizes Fisher's exact test to enrich functions of certain genes [42].

### Patients and tissue samples

All patients undergoing surgical treatment in the Hunan cancer hospital (Changsha, Hunan, China) for primary brain cancers between 2007 and 2013 were invited to participate in this institutional review board-approved study. This study compiled data for glioma tumor stages I through IV and normal brain controls. Tumors were histopathologically classified according to the WHO classification. The tissue samples were flash frozen in liquid nitrogen immediately after resection and stored at  $-80^{\circ}\text{C}$  for future processing.

### RNA extraction and real-time quantitative PCR

Total RNA was extracted by trizol reagent according to the manufacturer's protocol. When the A260/A280 ratio was between 1.9 and 2.1, the extracted RNA was determined to be pure and was used in subsequent experiments.  $2\mu\text{g}$  RNA was reverse-transcribed using the Primescript RT reagent Kit with gDNA Eraser (Takara Bio Inc, Japan). Real-time PCR was performed using the SYBR Premix DimerEraser kit (Takara Bio Inc, Japan). The reactions were cycled 40 times [ $95^{\circ}\text{C}$ , 30 seconds, ( $95^{\circ}\text{C}$ , 5 seconds;  $55^{\circ}\text{C}$ , 30 seconds; and  $72^{\circ}\text{C}$ , 30 seconds)] with fluorescence measurements. A melting curve was performed at the end of amplification cycles to verify the specificity of the PCR products. All the determinations were performed in duplicate. Primers used for real-time PCR are shown in Table 4. The relative expression of target gene mRNA was normalized to the expression level of GAPDH mRNA using the  $2^{-\Delta\text{Ct}}$  method.

### Statistical analysis

SPSS16.0 software was used for general statistical analyses. Comparisons between two experimental groups were performed using Student's t test. Survival rate was

**Table 4: Primer sequences used for real-time PCR**

| Gene     | Sequence                | Base |
|----------|-------------------------|------|
| RRM2-F   | GTGGAGCGATTTAGCCAAGAA   | 21   |
| RRM2-R   | CACAAGGCATCGTTTCAATGG   | 21   |
| COL3A1-F | TTGAAGGAGGATGTTCCCATCT  | 22   |
| COL3A1-R | ACAGACACATATTTGGCATGGTT | 23   |
| SH3GL2-F | ACTGTCCGAGGTCAAAGACTC   | 21   |
| SH3GL2-R | CCGGAATCTTGCCTTGTCGTT   | 21   |
| SNAP91-F | ACCTCCAGCCAGACTTTTCC    | 20   |
| SNAP91-R | CTCTCCCAAAGGTCTCCCC     | 20   |
| GAPDH-F  | GAGTCAACGGATTTGGTCGT    | 20   |
| GAPDH-R  | TTGATTTTGGAGGGATCTCG    | 20   |

calculated using the Kaplan-Meier method with the log-rank test applied for comparison. All tests performed were two-sided and the criterion for statistical significance was taken as  $p < 0.05$ .

## ACKNOWLEDGMENTS

This work was supported by the National High-tech R&D Program of China (863 Program) (2012AA02A517), National Natural Science Foundation of China (81373490, 81573508, 81573463), and Hunan Provincial Science and Technology Plan of China (2015TP1043), and Open Foundation of Innovative Platform in University of Hunan Province of China (2015-14).

## CONFLICTS OF INTEREST

The authors declare no conflict of interest.

## REFERENCES

- Mamelak AN, Jacoby DB. Targeted delivery of antitumoral therapy to glioma and other malignancies with synthetic chlorotoxin (TM-601). *Expert Opin Drug Deliv.* 2007; 4: 175-86. doi: 10.1517/17425247.4.2.175.
- Charles NA, Holland EC, Gilbertson R, Glass R, Kettenmann H. The brain tumor microenvironment. *Glia.* 2012; 60: 502-14.
- Goebell E, Paustenbach S, Vaeterlein O, Ding XQ, Heese O, Fiehler J, Kucinski T, Hagel C, Westphal M, Zeumer H. Low-grade and anaplastic gliomas: differences in architecture evaluated with diffusion-tensor MR imaging. *Radiology.* 2006; 239: 217-22. doi: 10.1148/radiol.2383050059.
- Buckner JC. Factors influencing survival in high-grade gliomas. *Semin Oncol.* 2003; 30: 10-4.
- Omuro A, DeAngelis LM. Glioblastoma and other malignant gliomas: a clinical review. *Jama.* 2013; 310: 1842-50. doi: 10.1001/jama.2013.280319.
- Linz U. Commentary on Effects of radiotherapy with concomitant and adjuvant temozolomide versus radiotherapy alone on survival in glioblastoma in a randomised phase III study: 5-year analysis of the EORTC-NCIC trial (*Lancet Oncol.* 2009;10:459-466). *Cancer.* 2010; 116: 1844-6. doi: 10.1002/cncr.24950.
- Stupp R, Hegi ME, Mason WP, van den Bent MJ, Taphoorn MJ, Janzer RC, Ludwin SK, Allgeier A, Fisher B, Belanger K, Hau P, Brandes AA, Gijtenbeek J, et al. Effects of radiotherapy with concomitant and adjuvant temozolomide versus radiotherapy alone on survival in glioblastoma in a randomised phase III study: 5-year analysis of the EORTC-NCIC trial. *Lancet Oncol.* 2009; 10: 459-66. doi: 10.1016/s1470-2045(09)70025-7.
- Minniti G, Scaringi C, Baldoni A, Lanzetta G, De Sanctis V, Esposito V, Enrici RM. Health-related quality of life in elderly patients with newly diagnosed glioblastoma treated with short-course radiation therapy plus concomitant and adjuvant temozolomide. *Int J Radiat Oncol Biol Phys.* 2013; 86: 285-91. doi: 10.1016/j.ijrobp.2013.02.013.
- Oike T, Suzuki Y, Sugawara K, Shirai K, Noda SE, Tamaki T, Nagaishi M, Yokoo H, Nakazato Y, Nakano T. Radiotherapy plus concomitant adjuvant temozolomide for glioblastoma: Japanese mono-institutional results. *PLoS One.* 2013; 8: e78943. doi: 10.1371/journal.pone.0078943.
- Wen PY, Kesari S. Malignant gliomas in adults. *N Engl J Med.* 2008; 359: 492-507. doi: 10.1056/NEJMra0708126.
- Sigala I, Tsamis KI, Gousia A, Alexiou G, Voulgaris S, Giannakouros T, Kyritsis AP, Nikolakaki E. Expression of SRPK1 in gliomas and its role in glioma cell lines viability. *Tumour Biol.* 2016. doi: 10.1007/s13277-015-4738-7.
- Chen W, Zhang L, Wang Y, Sun J, Wang D, Fan S, Ban N, Zhu J, Ji B, Wang Y. Expression of CDC5L is associated



- with tumor progression in gliomas. *Tumour Biol.* 2016; 37: 4093-103. doi: 10.1007/s13277-015-4088-5.
13. Kim JK, Jin X, Ham SW, Lee SY, Seo S, Kim SC, Kim SH, Kim H. IRF7 promotes glioma cell invasion by inhibiting AGO2 expression. *Tumour Biol.* 2015; 36: 5561-9. doi: 10.1007/s13277-015-3226-4.
  14. Resnier P, David S, Lautram N, Delcroix GJ, Clavreul A, Benoit JP, Passirani C. EGFR siRNA lipid nanocapsules efficiently transfect glioma cells in vitro. *Int J Pharm.* 2013; 454: 748-55. doi: 10.1016/j.ijpharm.2013.04.001.
  15. Zhang B, Feng X, Wang J, Xu X, Lin N, Liu H. Combined antitumor effect of Ad-bFGF-siRNA and Ad-Vpr on the growth of xenograft glioma in nude mouse model. *Pathol Oncol Res.* 2011; 17: 237-42. doi: 10.1007/s12253-010-9303-5.
  16. Liang C, Guo S, Yang L. Effects of alltrans retinoic acid on VEGF and HIF1alpha expression in glioma cells under normoxia and hypoxia and its antiangiogenic effect in an intracerebral glioma model. *Mol Med Rep.* 2014; 10: 2713-9. doi: 10.3892/mmr.2014.2543.
  17. Sinha S, Koul N, Dixit D, Sharma V, Sen E. IGF-1 induced HIF-1alpha-TLR9 cross talk regulates inflammatory responses in glioma. *Cell Signal.* 2011; 23: 1869-75. doi: 10.1016/j.cellsig.2011.06.024.
  18. Kumar S. P53 induction accompanying G2/M arrest upon knockdown of tumor suppressor HIC1 in U87MG glioma cells. *Mol Cell Biochem.* 2014; 395: 281-90. doi: 10.1007/s11010-014-2137-9.
  19. Tachibana I, Smith JS, Sato K, Hosek SM, Kimmel DW, Jenkins RB. Investigation of germline PTEN, p53, p16(INK4A)/p14(ARF), and CDK4 alterations in familial glioma. *Am J Med Genet.* 2000; 92: 136-41.
  20. Shai R, Shi T, Kremen TJ, Horvath S, Liao LM, Cloughesy TF, Mischel PS, Nelson SF. Gene expression profiling identifies molecular subtypes of gliomas. *Oncogene.* 2003; 22: 4918-23. doi: 10.1038/sj.onc.1206753.
  21. Laenen G, Thorrez L, Bornigen D, Moreau Y. Finding the targets of a drug by integration of gene expression data with a protein interaction network. *Mol Biosyst.* 2013; 9: 1676-85. doi: 10.1039/c3mb25438k.
  22. Morine MJ, Toomey S, McGillicuddy FC, Reynolds CM, Power KA, Browne JA, Loscher C, Mills KH, Roche HM. Network analysis of adipose tissue gene expression highlights altered metabolic and regulatory transcriptomic activity in high-fat-diet-fed IL-1RI knockout mice. *J Nutr Biochem.* 2013; 24: 788-95. doi: 10.1016/j.jnutbio.2012.04.012.
  23. Ho S, Chao Y, Tong W, Yu S. Sugar coordinately and differentially regulates growth- and stress-related gene expression via a complex signal transduction network and multiple control mechanisms. *Plant Physiol.* 2001; 125: 877-90.
  24. Shimizu T, Kurozumi K, Ishida J, Ichikawa T, Date I. Adhesion molecules and the extracellular matrix as drug targets for glioma. *Brain Tumor Pathol.* 2016; 33: 97-106. doi: 10.1007/s10014-016-0261-9.
  25. Hurmath FK, Mittal M, Ramaswamy P, Umamaheswara Rao GS, Dalavaikodihalli Nanjaiah N. Sevoflurane and thiopental preconditioning attenuates the migration and activity of MMP-2 in U87MG glioma cells. *Neurochem Int.* 2016; 94: 32-8. doi: 10.1016/j.neuint.2016.02.003.
  26. Liang Y, Diehn M, Watson N, Bollen AW, Aldape KD, Nicholas MK, Lamborn KR, Berger MS, Botstein D, Brown PO, Israel MA. Gene expression profiling reveals molecularly and clinically distinct subtypes of glioblastoma multiforme. *Proc Natl Acad Sci U S A.* 2005; 102: 5814-9. doi: 10.1073/pnas.0402870102.
  27. Schiffgens S, Wilkens L, Brandes AA, Meier T, Franceschi E, Ermani M, Hartmann C, Sandalcioglu IE, Dumitru CA. Sex-specific clinicopathological significance of novel (Frizzled-7) and established (MGMT, IDH1) biomarkers in glioblastoma. *Oncotarget.* 2016. doi: 10.18632/oncotarget.10465.
  28. Podergajs N, Motaln H, Rajcevic U, Verbovsek U, Korsic M, Obad N, Espedal H, Vittori M, Herold-Mende C, Miletic H, Bjerkvig R, Turnsek TL. Transmembrane protein CD9 is glioblastoma biomarker, relevant for maintenance of glioblastoma stem cells. *Oncotarget.* 2016; 7: 593-609. doi: 10.18632/oncotarget.5477.
  29. Brown DV, Daniel PM, D'Abaco GM, Gogos A, Ng W, Morokoff AP, Mantamadiotis T. Coexpression analysis of CD133 and CD44 identifies proneural and mesenchymal subtypes of glioblastoma multiforme. *Oncotarget.* 2015; 6: 6267-80. doi: 10.18632/oncotarget.3365.
  30. Kong CH, Lin XY, Woo CC, Wong HC, Lee CN, Richards AM, Sorokin VA. Characteristics of aortic wall extracellular matrix in patients with acute myocardial infarction: tissue microarray detection of collagen I, collagen III and elastin levels. *Interact Cardiovasc Thorac Surg.* 2013; 16: 11-5. doi: 10.1093/icvts/ivs421.
  31. Lv W, Lin Y, Song W, Sun K, Yu H, Zhang Y, Zhang C, Li L, Suo M, Hui R, Chen J. Variants of COL3A1 are associated with the risk of stroke recurrence and prognosis in the Chinese population: a prospective study. *J Mol Neurosci.* 2014; 53: 196-203. doi: 10.1007/s12031-014-0283-x.
  32. Kartha VK, Stawski L, Han R, Haines P, Gallagher G, Noonan V, Kukuruzinska M, Monti S, Trojanowska M. PDGFRbeta Is a Novel Marker of Stromal Activation in Oral Squamous Cell Carcinomas. *PLoS One.* 2016; 11: e0154645. doi: 10.1371/journal.pone.0154645.
  33. Ishikawa K, Nagase T, Suyama M, Miyajima N, Tanaka A, Kotani H, Nomura N, Ohara O. Prediction of the coding sequences of unidentified human genes. X. The complete sequences of 100 new cDNA clones from brain which can code for large proteins in vitro. *DNA Res.* 1998; 5: 169-76.
  34. Lee Y, Vassilakos A, Feng N, Lam V, Xie H, Wang M, Jin H, Xiong K, Liu C, Wright J, Young A. GTI-2040, an antisense agent targeting the small subunit component (R2)

- of human ribonucleotide reductase, shows potent antitumor activity against a variety of tumors. *Cancer Res.* 2003; 63: 2802-11.
35. Duxbury MS, Ito H, Zinner MJ, Ashley SW, Whang EE. RNA interference targeting the M2 subunit of ribonucleotide reductase enhances pancreatic adenocarcinoma chemosensitivity to gemcitabine. *Oncogene.* 2004; 23: 1539-48. doi: 10.1038/sj.onc.1207272.
  36. Burton TR, Kashour T, Wright JA, Amara FM. Cellular signaling pathways affect the function of ribonucleotide reductase mRNA binding proteins: mRNA stabilization, drug resistance, and malignancy (Review). *Int J Oncol.* 2003; 22: 21-31.
  37. Yao Y, Xue Y, Ma J, Shang C, Wang P, Liu L, Liu W, Li Z, Qu S, Li Z, Liu Y. MiR-330-mediated regulation of SH3GL2 expression enhances malignant behaviors of glioblastoma stem cells by activating ERK and PI3K/AKT signaling pathways. *PLoS One.* 2014; 9: e95060. doi: 10.1371/journal.pone.0095060.
  38. Qu S, Yao Y, Shang C, Xue Y, Ma J, Li Z, Liu Y. MicroRNA-330 is an oncogenic factor in glioblastoma cells by regulating SH3GL2 gene. *PLoS One.* 2012; 7: e46010. doi: 10.1371/journal.pone.0046010.
  39. Grunda JM, Nabors LB, Palmer CA, Chhieng DC, Steg A, Mikkelsen T, Diasio RB, Zhang K, Allison D, Grizzle WE, Wang W, Gillespie GY, Johnson MR. Increased expression of thymidylate synthetase (TS), ubiquitin specific protease 10 (USP10) and survivin is associated with poor survival in glioblastoma multiforme (GBM). *J Neurooncol.* 2006; 80: 261-74. doi: 10.1007/s11060-006-9191-4.
  40. Larsson O, Wahlestedt C, Timmons JA. Considerations when using the significance analysis of microarrays (SAM) algorithm. *BMC Bioinformatics.* 2005; 6: 129. doi: 10.1186/1471-2105-6-129.
  41. Ernst J, Bar-Joseph Z. STEM: a tool for the analysis of short time series gene expression data. *BMC Bioinformatics.* 2006; 7: 191. doi: 10.1186/1471-2105-7-191.
  42. Li G, Pan W, Yang X, Miao J. Gene co-expression network and function modules in three types of glioma. *Mol Med Rep.* 2015; 11: 3055-63. doi: 10.3892/mmr.2014.3014.
